# Supplementary material for: A multi-center study on glucometabolic response to bariatric surgery for different subtypes of obesity
Source: PubMed Central journal article supplement (PMC9669340; doi:10.3389/fendo.2022.989202), 2022-11-03
Supplement: DataSheet_1.pdf [file DataSheet_1.pdf]

## *Supplementary Material*

### **A multi-center study on glucometabolic response to bariatric surgery for different subtypes of obesity**

Yao Liu<sup>1†</sup>, Chunjun Sheng<sup>1†</sup>, Wenhuan Feng<sup>2</sup>, Fang Sun<sup>3</sup>, Jingjing Zhang<sup>4</sup>, Ying Chen<sup>5</sup>, Lili Su<sup>1</sup>, Jia Liu<sup>1</sup>, Lei Du<sup>1</sup>, Xuyang Jia<sup>1</sup>, Hui You<sup>1</sup>, Xiu Huang<sup>1</sup>, Shandong Wu<sup>6</sup>, Ziwei Lin<sup>1\*</sup>, and Shen Qu<sup>1\*</sup>

<sup>1</sup>Department of Endocrinology and Metabolism, Shanghai Tenth People's Hospital, Tongji University School of Medicine, Shanghai 200072, China

<sup>2</sup>Department of Endocrinology, Drum Tower Hospital Affiliated to Nanjing University Medical School, Nanjing, 210008, China

<sup>3</sup>Department of Hypertension and Endocrinology, Daping Hospital, Army Medical University, Chongqing Institute of Hypertension, Chongqing 400042, China.

<sup>4</sup>National Clinical Research Center for Metabolic Diseases, Metabolic Syndrome Research Center, Key Laboratory of Diabetes Immunology, Ministry of Education, and Department of Metabolism and Endocrinology, The Second Xiangya Hospital of Central South University, Changsha 410011, Hunan, China

<sup>5</sup>Ministry of Education Key Laboratory of Metabolism and Molecular Medicine, Department of Endocrinology and Metabolism, Zhongshan Hospital, Fudan University, Shanghai 200032, China.

<sup>6</sup>Department of Radiology, Department of Biomedical Informatics, Department of Bioengineering, Intelligent Systems Program, University of Pittsburgh, Pittsburgh, PA, United States

†These authors contributed equally to this work and share first authorship.

\*Correspondence: Ziwei Lin (Email: lin\_ziwei225@163.com) and Shen Qu (Email: qushencn@hotmail.com)

## Supplementary Methods

### AIM grouping of patients with obesity

The modeling method for AIM subgrouping has been described in our previous study<sup>1</sup>. Briefly, obesity patients were clustered into four subgroups (i.e., MHO, HMO-U, HMO-I, and LMO) using the k-means algorithm. Men and women were separately modeled with two sub-models. The key variables used for the k-means clustering were glucoseAUC, insulinAUC, and uric acid (cluster centers were shown in Table S1).

### Missing value imputation

The linear regression model was trained and tested in 70% and 30%, respectively, of the data from Cohort-1 using the stepwise method. The F test was performed with  $P < 0.05$  for inclusion and  $P > 0.1$  for exclusion with the outlier tolerance of 0.0001. InsulinAUC showed an adjusted R of 0.902 and 0.903 in the training and testing datasets, respectively (Table S2).

### References

1. Lin Z, Feng W, Liu Y, et al. Machine Learning to Identify Metabolic Subtypes of Obesity: A Multi-Center Study. *Front Endocrinol (Lausanne)*. 2021;12:713592.

## Supplementary Tables

**Table S1. Cluster centers for k-means model.**

|                              | MHO   | HMO-U | HMO-I | LMO  |
|------------------------------|-------|-------|-------|------|
| <b>Sub-model for Men</b>     |       |       |       |      |
| Glucose $AUC$ , mmol/L·min   | 993   | 982   | 1008  | 1845 |
| Insulin $AUC$ , mU/L·min     | 17089 | 19951 | 50543 | 9477 |
| Uric acid, $\mu\text{mol/L}$ | 405   | 585   | 489   | 404  |
| <b>Sub-model for Women</b>   |       |       |       |      |
| Glucose $AUC$ , mmol/L·min   | 928   | 1100  | 1094  | 1829 |
| Insulin $AUC$ , mU/L·min     | 12894 | 21895 | 54645 | 9320 |
| Uric acid, $\mu\text{mol/L}$ | 331   | 454   | 392   | 356  |

AUC: area under the curve during oral glucose tolerance test; HMO-U: hypermetabolic obesity-hyperuricemia subtype; HMO-I: hypermetabolic obesity-hyperinsulinemia subtype; LMO: hypometabolic obesity; MHO: metabolic healthy obesity.

**Table S2. Regression models for prediction of AUC of insulin during OGTT.**

| Predictors                          | $\beta$    | Standardized $\beta$ | $t$ test | $P$    | Adjusted R          |                    |
|-------------------------------------|------------|----------------------|----------|--------|---------------------|--------------------|
|                                     |            |                      |          |        | in training dataset | in testing dataset |
| <b>Constant</b>                     | -13032.851 |                      | -17.477  | <0.001 |                     |                    |
| <b>C-peptide</b> $_{60\text{min}}$  | 1309.195   | 0.601                | 22.473   | <0.001 |                     |                    |
| <b>C-peptide</b> $_{120\text{min}}$ | 439.883    | 0.177                | 9.644    | <0.001 |                     |                    |
| <b>C-peptide</b> $_{30\text{min}}$  | 656.368    | 0.273                | 12.859   | <0.001 | 0.902               | 0.903              |
| <b>Glucose</b> $_{120\text{min}}$   | 710.316    | 0.213                | 7.395    | <0.001 |                     |                    |
| <b>Glucose</b> $_{60\text{min}}$    | -562.742   | -0.157               | -6.072   | <0.001 |                     |                    |
| <b>C-peptide</b> $_{0\text{min}}$   | 467.843    | 0.057                | 3.592    | <0.001 |                     |                    |

Models were trained with Cohort-1 patients, among which 70% of the samples were used as training datasets and 30% as testing datasets. AUC: area under the curve; OGTT: oral glucose tolerance test.

**Table S3. The anthropometry characteristics of the four AIM subgroups of obesity patients at baseline and 12-month post-surgery.**

|                                  | <b>MHO</b>                     | <b>HMO-U</b>                   | <b>HMO-I</b>            | <b>LMO</b>                     | <b>p value<sup>&amp;</sup></b> |
|----------------------------------|--------------------------------|--------------------------------|-------------------------|--------------------------------|--------------------------------|
| <b>N</b>                         | 118                            | 111                            | 14                      | 116                            |                                |
| <b>Man/Woman (woman %)</b>       | 50/68(57.6%)                   | 49/62(55.9%)                   | 8/6(42.9%)              | 50/66(56.9%)                   | 0.055                          |
| <b>Age (years)</b>               | 32(27,42)                      | 28(23,35)                      | 32(25,35)               | 40(31,48)                      | <0.0001                        |
| <b>Obesity duration (years)</b>  | 10.0(5.5,20.0)                 | 10.5(5.8,20.0)                 | 10.0(5.0,20.0)          | 13.0(9.0,20.0)                 | 0.129                          |
| <b>Type of surgery</b>           | 28.0%                          | 15.3%                          | 14.3%                   | 44.8%                          | <0.0001                        |
| <b>Rate of diabetes (%)</b>      | 37.4%                          | 29.1%                          | 7.1%                    | 100%                           | <0.0001                        |
| <b>Diabetes duration (years)</b> | 1.0(0,4.0)                     | 0(0,1.8)                       | 0(0,0)                  | 1.0(0,5.5)                     | 0.193                          |
| <b>Weight (kg)</b>               |                                |                                |                         |                                |                                |
| Baseline                         | 104.3 (91.7, 128.2)            | 116.9 (98.3, 133.5)            | 119.0 (100.5, 132.3)    | 98.3 (82.3, 113.9)             | <0.0001                        |
| 12 months                        | 74.1 (64.1, 87.3) <sup>#</sup> | 78.4 (66.9, 89.1) <sup>#</sup> | 80.2 (71.1, 95.9)       | 71.7 (62.1, 83.2) <sup>#</sup> | 0.354                          |
| Absolute change                  | -31.6 (-41.8, -23.7)           | -37.8 (-47.2, -31.3)           | -37.4 (-53.8, -31.9)    | -24.6 (-31.8, -17.1)           | <0.0001                        |
| Percent change (%)               | -29.4% (-35.7%, -25.0%)        | -33.5% (-38.3%, -26.9%)        | -34.0% (-37.6%, -25.0%) | -24.4% (-30.2%, -20.3%)        | <0.0001                        |
| <b>BMI (kg/m<sup>2</sup>)</b>    |                                |                                |                         |                                |                                |
| Baseline                         | 37.8 (34.4, 42.2)              | 40.1 (35.8, 45.4)              | 39.1 (35.8, 42.3)       | 35.5 (30.6, 40.6)              | 0.001                          |
| 12 months                        | 26.9 (23.5, 30.1) <sup>#</sup> | 27.0 (24.5, 30.3) <sup>#</sup> | 27.1 (24.7, 29.1)       | 26.7 (23.3, 29.4) <sup>#</sup> | 0.781                          |
| Absolute change                  | -11.1 (-13.9, -9.2)            | -13.3 (-16.3, -10.8)           | -12.5 (-16.2, -9.2)     | -8.9 (-11.3, -6.4)             | <0.0001                        |
| Percent change (%)               | -29.4% (-35.7%, -25.0%)        | -33.5% (-38.3%, -26.9%)        | -34.0% (-37.6%, -25.0%) | -24.4% (-30.2%, -20.3%)        | <0.0001                        |
| <b>Excess weight (kg)</b>        |                                |                                |                         |                                |                                |
| Baseline                         | 39.8 (28.7, 56.0)              | 45.8 (33.0, 62.0)              | 44.3 (33.4, 57.3)       | 31.9 (18.4, 48.1)              | <0.0001                        |
| 12 months                        | 8.1 (-1.3, 17.4) <sup>#</sup>  | 8.2 (1.4, 17.0) <sup>#</sup>   | 10.3 (1.9, 16.9)        | 7.2 (-2.1, 15.9) <sup>#</sup>  | 0.696                          |
| Absolute change                  | -31.6 (-41.8, -23.7)           | -37.8 (-47.2, -31.3)           | -37.4 (-53.8, -31.9)    | -24.6 (-31.8, -17.1)           | <0.0001                        |
| Percent change (%)               | -81.1% (-105.6%, -66.2%)       | -83.1% (-96.6%, -68.7%)        | -79.3% (-95.8%, -65.9%) | -77.7% (-111.8%, -62.0%)       | 0.756                          |
| <b>WC (cm)</b>                   |                                |                                |                         |                                |                                |
| Baseline                         | 117 (105, 129)                 | 121 (112, 130)                 | 125 (109, 139)          | 113 (103, 125)                 | 0.009                          |
| 12 months                        | 89 (82, 101)                   | 92 (85, 98)                    | 90 (84, 96)             | 92 (83, 98) <sup>#</sup>       | 0.885                          |
| Absolute change                  | -27 (-35, -19)                 | -31 (-35, -23)                 | -30 (-46, -26)          | -21 (-29, -14)                 | <0.0001                        |
| Percent change (%)               | -22.8% (-28.6%, -16.6%)        | -23.9% (-29.9%, -19.5%)        | -26.7% (-30.9%, -22.0%) | -18.2% (-23.7%, -14.8%)        | <0.0001                        |
| <b>HC (cm)</b>                   |                                |                                |                         |                                |                                |
| Baseline                         | 120 (113, 129)                 | 122 (115, 132)                 | 122 (112, 131)          | 114 (105, 124)                 | <0.0001                        |
| 12 months                        | 101 (95, 106) <sup>#</sup>     | 100 (94, 107) <sup>#</sup>     | 103 (98, 107)           | 98 (91, 105) <sup>#</sup>      | 0.486                          |
| Absolute change                  | -20 (-25, -13)                 | -23 (-28, -16)                 | -19 (-33, -11)          | -13 (-19, -8)                  | <0.0001                        |
| Percent change (%)               | -16.0% (-19.7%, -11.6%)        | -18.3% (-21.6%, -12.7%)        | -15.3% (-22.7%, -9.5%)  | -11.6% (-15.0%, -7.7%)         | <0.0001                        |

|                    | MHO                   | HMO-U                 | HMO-I                   | LMO                   | p value <sup>&amp;</sup> |
|--------------------|-----------------------|-----------------------|-------------------------|-----------------------|--------------------------|
| <b>WHR (ratio)</b> |                       |                       |                         |                       |                          |
| Baseline           | 0.98 (0.91, 1.03)     | 0.98 (0.94, 1.03)     | 1.02 (0.98, 1.06)       | 0.99 (0.95, 1.04)     | 0.129                    |
| 12 months          | 0.91 (0.85, 0.95)     | 0.90 (0.87, 0.95)     | 0.88 (0.83, 0.93)       | 0.92 (0.88, 0.97)     | 0.065                    |
| Absolute change    | -0.08 (-0.12, -0.03)  | -0.08 (-0.13, -0.04)  | -0.13 (-0.18, -0.10)    | -0.07 (-0.10, -0.04)  | 0.065                    |
| Percent change (%) | -8.2% (-11.8%, -3.7%) | -8.3% (-12.2%, -3.9%) | -12.8% (-16.8%, -10.8%) | -6.7% (-10.4%, -4.1%) | 0.062                    |

Analysis are in only those patients having the 12-month follow-up visit. Values are shown as ratio or median (IQR 25-75%), and analysis were adjusted for sex and age (except analysis for sex and age). MHO: metabolic healthy obesity; HMO-U: hypermetabolic obesity-hyperuricemia subtype; HMO-I: hypermetabolic obesity-hyperinsulinemia subtype; LMO: hypometabolic obesity; BMI, body mass index; WC, waist circumference; HC, hip circumference; WHR, Waist-to-Hip Ratio. <sup>#</sup>P< 0.01 vs. baseline; <sup>&</sup> the overall ANCOVA p values.

**Table S4. The glucometabolism of the four AIM subgroups of obesity and normal weight controls at baseline and 12-month post-surgery.**

|                                           | MHO                             | HMO-U                           | HMO-I                          | LMO                            | NW                | P value <sup>&amp;</sup> |
|-------------------------------------------|---------------------------------|---------------------------------|--------------------------------|--------------------------------|-------------------|--------------------------|
| <b>Fasting glucose (mmol/L)</b>           |                                 |                                 |                                |                                |                   |                          |
| Baseline                                  | 5.20 (4.77, 5.93)               | 5.20 (4.78, 5.92)               | 5.20 (4.65, 5.53)              | 8.28 (6.86, 10.55)             |                   | <0.0001                  |
| 12 months                                 | 4.47 (4.10, 4.76) <sup>##</sup> | 4.40 (4.15, 4.70) <sup>##</sup> | 4.60 (4.40, 4.91)              | 4.87 (4.38, 5.70) <sup>#</sup> | 4.86 (4.60, 5.22) | <0.0001                  |
| Absolute change                           | -0.63 (-0.27, -1.35)            | -0.80 (-0.30, -1.50)            | -0.60 (0.15, -1.12)            | -3.46 (-1.70, -5.56)           |                   | <0.0001                  |
| Percent change (%)                        | -13.3% (-23.5%, -5.9%)          | -15.3% (-25.9%, -6.4%)          | -12.0% (-19.4%, 3.4%)          | -40.9% (-53.6%, -27.4%)        |                   | <0.0001                  |
| <b>OGTT 2h glucose (mmol/L)</b>           |                                 |                                 |                                |                                |                   |                          |
| Baseline                                  | 7.20 (6.20, 9.10)               | 8.00 (6.41, 9.45)               | 6.95 (5.31, 7.75)              | 15.90 (14.10, 18.75)           |                   | <0.0001                  |
| 12 months                                 | 4.38 (3.89, 5.10) <sup>##</sup> | 4.18 (3.35, 4.69) <sup>##</sup> | 4.40 (3.48, 4.80) <sup>*</sup> | 4.80 (3.90, 7.26) <sup>#</sup> | 5.79 (4.88, 6.55) | 0.001                    |
| Absolute change                           | -2.70 (-4.92, -1.65)            | -3.70 (-5.40, -2.30)            | -3.00 (-3.45, -0.47)           | -10.27 (-13.38, -7.83)         |                   | <0.0001                  |
| Percent change (%)                        | -39.5% (-53.7%, -26.1%)         | -48.4% (-60.2%, -35.2%)         | -38.0% (-51.3%, -8.9%)         | -68.1% (-75.7%, -59.0%)        |                   | <0.0001                  |
| <b>Glucose<sub>AUC</sub> (mmol/L•min)</b> |                                 |                                 |                                |                                |                   |                          |
| Baseline                                  | 980 (825, 1131)                 | 1028 (921, 1172)                | 1080 (947, 1209)               | 1711 (1511, 2009)              |                   | <0.0001                  |
| 12 months                                 | 739 (644, 869)                  | 732 (611, 837) <sup>*</sup>     | 623 (566, 1034) <sup>#</sup>   | 951 (817, 1286) <sup>##</sup>  | 829 (740, 921)    | <0.0001                  |
| Absolute change                           | -183 (-286, -79)                | -275 (-398, -125)               | -375 (-460, -197)              | -809 (-1092, -458)             |                   | <0.0001                  |
| Percent change (%)                        | -18.8% (-30.4%, -8.9%)          | -27.3% (-37.3%, -13.3%)         | -38.4% (-46.8%, -16.0%)        | -45.2% (-56.5%, -26.5%)        |                   | <0.0001                  |
| <b>Fasting insulin (mU/l)</b>             |                                 |                                 |                                |                                |                   |                          |
| Baseline                                  | 21.78 (14.29, 32.31)            | 32.15 (24.05, 43.46)            | 45.32 (26.00, 68.32)           | 18.97 (12.77, 27.07)           |                   | <0.0001                  |
| 12 months                                 | 7.40 (4.63, 11.04) <sup>#</sup> | 8.17 (5.56, 11.59) <sup>#</sup> | 8.13 (4.90, 12.99)             | 8.47 (4.96, 13.26)             | 8.7 (5.65, 13.09) | 0.358                    |
| Absolute change                           | -15.07 (-23.40, -7.73)          | -23.75 (-33.79, -16.38)         | -28.09 (-50.54, -18.78)        | -11.30 (-19.72, -4.69)         |                   | <0.0001                  |
| Percent change (%)                        | -69.6% (-79.5%, -55.9%)         | -77.1% (-82.1%, -63.4%)         | -76.4% (-88.1%, -72.5%)        | -56.8% (-76.4%, -36.2%)        |                   | <0.0001                  |

|                                          | MHO                               | HMO-U                            | HMO-I                             | LMO                               | NW                  | P value <sup>&amp;</sup> |
|------------------------------------------|-----------------------------------|----------------------------------|-----------------------------------|-----------------------------------|---------------------|--------------------------|
| <b>OGTT 2h insulin (mU/I)</b>            |                                   |                                  |                                   |                                   |                     |                          |
| Baseline                                 | 94.83 (60.17, 152.50)             | 162.15 (119.48, 260.40)          | 359.80 (271.25, 467.50)           | 48.44 (31.23, 94.17)              |                     | <0.0001                  |
| 12 months                                | 10.74 (6.41, 41.83) <sup>##</sup> | 11.48 (7.94, 24.87) <sup>*</sup> | 11.09 (7.74, 60.25) <sup>##</sup> | 19.21 (12.13, 36.98) <sup>*</sup> | 57.78 (37.29, 91.1) | 0.025                    |
| Absolute change                          | -63.43 (-136.33, -33.60)          | -134.83 (-259.96, -95.09)        | -327.93 (-433.78,                 | -28.25 (-73.69, -2.74)            |                     | <0.0001                  |
| Percent change (%)                       | -83.8% (-94.6%, -55.4%)           | -92.3% (-95.8%, -83.3%)          | -96.0% (-98.1%, -87.2%)           | -62.1% (-83.2%, -14.8%)           |                     | <0.0001                  |
| <b>Insulin<sub>AUC</sub> (mU/I •min)</b> |                                   |                                  |                                   |                                   |                     |                          |
| Baseline                                 | 12335 (8658, 17630)               | 20134 (14392, 27719)             | 45680 (42455, 52353)              | 5454 (3243, 10121)                |                     | <0.0001                  |
| 12 months                                | 8284 (5424, 16907) <sup>#</sup>   | 12319 (6482, 20469) <sup>*</sup> | 14390 (6141, 33496) <sup>#</sup>  | 5797 (3161, 10971) <sup>#</sup>   | 6915 (5310, 10462)  | 0.174                    |
| Absolute change                          | -907 (-5250, 3949)                | -7759 (-14863, 1108)             | -36048 (-41321, -28410)           | 558 (-3465, 4818)                 |                     | <0.0001                  |
| Percent change (%)                       | -13.1% (-50.8%, 44.2%)            | -37.7% (-71.8%, 6.9%)            | -72.8% (-87.9%, -52.5%)           | 24.6% (-40.5%, 114.2%)            |                     | <0.0001                  |
| <b>HBA<sub>1C</sub> (%)</b>              |                                   |                                  |                                   |                                   |                     |                          |
| Baseline                                 | 5.7 (5.5, 6.3)                    | 5.8 (5.5, 6.2)                   | 5.8 (5.5, 6.0)                    | 7.9 (6.8, 9.3)                    |                     | <0.0001                  |
| 12 months                                | 5.30 (5.10, 5.50) <sup>#</sup>    | 5.20 (5.00, 5.40) <sup>#</sup>   | 5.40 (5.10, 5.55)                 | 5.60 (5.30, 6.00) <sup>*</sup>    | 5.35 (5.10, 5.60)   | <0.0001                  |
| Absolute change                          | -0.5 (-1.0, -0.2)                 | -0.5 (-0.9, -0.3)                | -0.4 (-0.9, -0.1)                 | -2.1 (-3.0, -1.0)                 |                     | <0.0001                  |
| Percent change (%)                       | -8.3% (-15.9%, -3.6%)             | -9.1% (-15.3%, -5.6%)            | -6.9% (-15.6%, -0.9%)             | -27.2% (-34.4%, -15.1%)           |                     | <0.0001                  |
| <b>HOMA-IR</b>                           |                                   |                                  |                                   |                                   |                     |                          |
| Baseline                                 | 5.11 (3.47, 7.98)                 | 7.53 (5.88, 10.89)               | 9.17 (5.55, 16.18)                | 7.46 (4.74, 11.48)                |                     | <0.0001                  |
| 12 months                                | 1.55 (0.91, 2.25)                 | 1.66 (1.11, 2.22)                | 1.60 (0.97, 2.89)                 | 1.96 (1.15, 2.94)                 | 1.89 (1.19, 2.88)   | 0.039                    |
| Absolute change                          | -3.53 (-6.17, -2.27)              | -6.02 (-8.48, -3.79)             | -6.89 (-12.99, -3.98)             | -5.13 (-9.60, -2.67)              |                     | 0.010                    |
| Percent change (%)                       | -74.4% (-82.6%, -60.4%)           | -80.1% (-85.9%, -69.0%)          | -80.0% (-89.9%, -71.2%)           | -74.6% (-86.5%, -55.6%)           |                     | 0.099                    |
| <b>WBISI</b>                             |                                   |                                  |                                   |                                   |                     |                          |
| Baseline                                 | 2.03 (1.39, 2.94)                 | 1.20 (0.92, 1.52)                | 0.75 (0.62, 0.88)                 | 1.73 (1.19, 2.78)                 |                     | <0.0001                  |
| 12 months                                | 5.07 (3.66, 6.80)                 | 4.41 (3.30, 6.46)                | 4.83 (1.82, 7.79) <sup>#</sup>    | 4.39 (2.94, 7.65)                 | 4.69 (3.22, 6.75)   | 0.749                    |
| Absolute change                          | 3.18 (1.13, 4.43)                 | 3.14 (1.93, 5.06)                | 4.22 (1.79, 7.57)                 | 2.40 (0.65, 6.15)                 |                     | 0.129                    |
| Percent change (%)                       | 135.5% (54.9%, 232.4%)            | 293.2% (168.7%, 460.5%)          | 522.5% (233.3%, 1404.6%)          | 187.5% (29.7%, 423.0%)            |                     | <0.0001                  |
| <b>HOMA-beta</b>                         |                                   |                                  |                                   |                                   |                     |                          |
| Baseline                                 | 249 (161, 360)                    | 361 (240, 524)                   | 567 (325, 892)                    | 85 (44, 136)                      |                     | <0.0001                  |
| 12 months                                | 149 (81, 242)                     | 178 (126, 273) <sup>#</sup>      | 148 (109, 267) <sup>#</sup>       | 128 (76, 212) <sup>#</sup>        | 126 (81, 187)       | 0.985                    |
| Absolute change                          | -83 (-214, -20)                   | -203 (-320, -56)                 | -349 (-594, -149)                 | 30 (-22, 110)                     |                     | <0.0001                  |
| Percent change (%)                       | -38.9% (-63.3%, -10.8%)           | -55.0% (-68.3%, -23.0%)          | -68.1% (-76.2%, -55.1%)           | 36.1% (-27.6%, 171.1%)            |                     | <0.0001                  |
| <b>IGI</b>                               |                                   |                                  |                                   |                                   |                     |                          |
| Baseline                                 | 25.7 (16.7, 51.5)                 | 30.0 (20.9, 47.2)                | 60.8 (40.4, 93.5)                 | 5.0 (2.2, 7.7)                    |                     | <0.0001                  |
| 12 months                                | 47.3 (28.7, 75.5) <sup>*</sup>    | 42.6 (23.9, 70.9) <sup>*</sup>   | 54.4 (9.7, 155.4) <sup>*</sup>    | 17.4 (6.2, 34.4) <sup>#</sup>     | 17.4 (11.5, 27.2)   | 0.009                    |
| Absolute change                          | 11.54 (-5.58, 42.50)              | 13.95 (-12.42, 40.31)            | -1.93 (-47.30, 214.16)            | 13.91 (3.32, 34.50)               |                     | 0.293                    |

|                                 | <b>MHO</b>                        | <b>HMO-U</b>                       | <b>HMO-I</b>                      | <b>LMO</b>                      | <b>NW</b>          | <b>P value<sup>&amp;</sup></b> |
|---------------------------------|-----------------------------------|------------------------------------|-----------------------------------|---------------------------------|--------------------|--------------------------------|
| Percent change (%)              | 23.8% (-42.1%, 205.1%)            | 39.9% (-40.8%, 118.4%)             | -1.8% (-84.3%, 189.0%)            | 285.8% (54.8%, 518.4%)          |                    | 0.202                          |
| <b>DI (HOMA-beta / HOMA-IR)</b> |                                   |                                    |                                   |                                 |                    |                                |
| Baseline                        | 50.9 (31.2, 65.9)                 | 48.5 (31.8, 72.1)                  | 55.1 (39.6, 90.5)                 | 10.9 (6.6, 18.6)                |                    | <0.0001                        |
| 12 months                       | 91.0 (66.1, 153.1) <sup>*#</sup>  | 113.6 (79.0, 153.1) <sup>*#</sup>  | 79.8 (63.3, 113.6)                | 65.9 (35.7, 121.5) <sup>#</sup> | 68.1 (50.1, 89.4)  | 0.037                          |
| Absolute change                 | 43.42 (13.05, 88.46)              | 53.22 (22.92, 102.52)              | 20.21 (-34.41, 53.64)             | 46.88 (24.25, 100.45)           |                    | 0.230                          |
| Percent change (%)              | 83.6% (26.7%, 248.6%)             | 121.0% (38.8%, 256.8%)             | 27.2% (-34.0%, 123.0%)            | 507.1% (198.9%, 964.7%)         |                    | <0.0001                        |
| <b>DI (IGI · WBISI120)</b>      |                                   |                                    |                                   |                                 |                    |                                |
| Baseline                        | 53.3 (30.6, 93.7)                 | 39.8 (25.4, 65.1)                  | 44.5 (33.0, 83.7)                 | 6.8 (3.4, 12.2)                 |                    | <0.0001                        |
| 12 months                       | 165.1 (91.7, 262.7) <sup>*#</sup> | 165.3 (104.4, 297.1) <sup>*#</sup> | 263.0 (66.6, 451.1) <sup>*#</sup> | 51.2 (17.1, 117.5) <sup>#</sup> | 89.3 (54.4, 121.1) | <0.0001                        |
| Absolute change                 | 101.67 (20.06, 210.00)            | 134.54 (54.51, 268.56)             | 172.62 (0.20, 451.17)             | 43.97 (14.49, 112.71)           |                    | 0.019                          |
| Percent change (%)              | 181.7% (30.1%, 364.1%)            | 238.2% (80.4%, 639.6%)             | 290.0% (-0.8%, 2653.6%)           | 719.2% (31.2%, 1612.4%)         |                    | 0.196                          |

Analysis are in only those patients having the 12-month follow-up visit. Values are shown as median (IQR 25-75%), and analysis were adjusted for sex and age. MHO: metabolic healthy obesity; HMO-U: hypermetabolic obesity-hyperuricemia subtype; HMO-I: hypermetabolic obesity-hyperinsulinemia subtype; LMO: hypometabolic obesity; AUC, area under curve; HbA1c, glycosylated hemoglobin a1c; HOMA-IR, homeostatic model assessment of insulin resistance; WBISI, whole-body insulin sensitivity index; HOMA-beta, Homeostatic model assessment of beta-cell function; IGI, insulinogenic index; DI, Disposition indices; NW, normal-weight controls. \*P< 0.01 vs. NW, <sup>#</sup>P< 0.01 vs. baseline. & the overall ANCOVA p values.

## Supplementary Figures

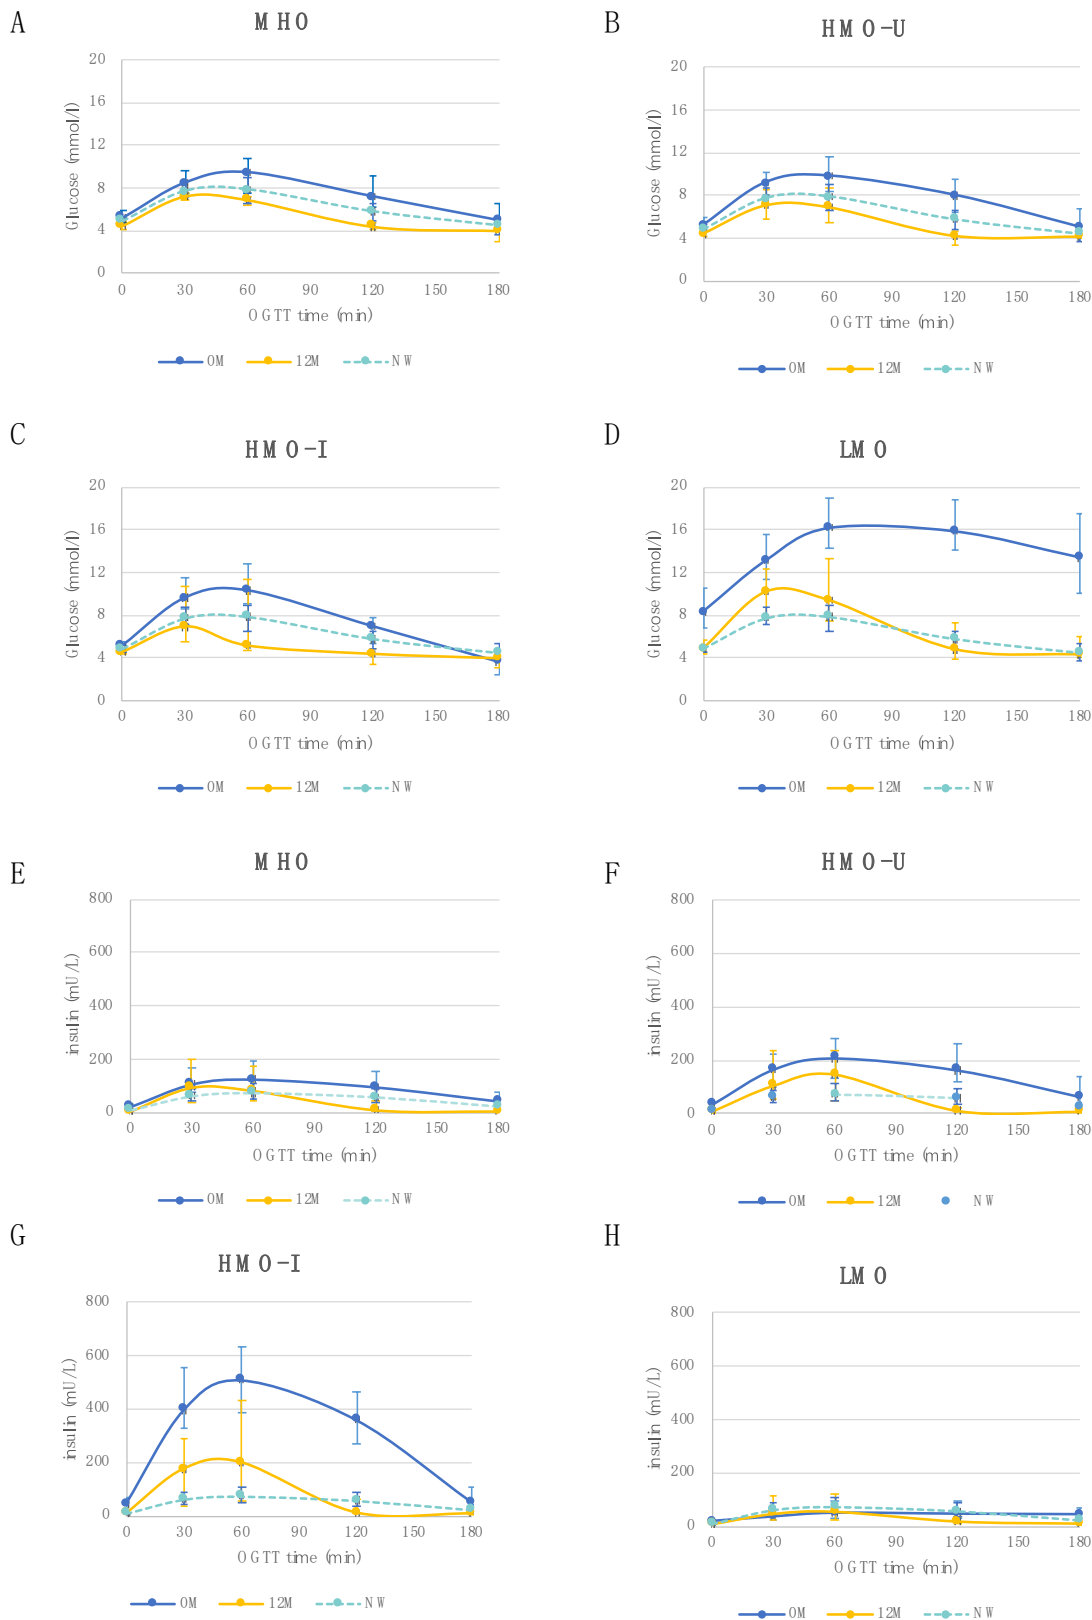

**Figure S1 Comparison of different AIM subgroups of obesity and normal-weight controls for oral glucose tolerance test (OGTT) curves at baseline and 12-month post-surgery. A-D, OGTT for glucose; E-H, OGTT for insulin. Analysis are in only those patients having the 12-month follow-up visit. MHO, metabolic healthy obesity; HMO-I, hypermetabolic obesity hyperinsulinemia subtype; HMO-U, hypermetabolic obesity hyperuricemia subtype; LMO, hypometabolic obesity; NW, normal weight control; 0M, pre- surgery; 12M, 12-month post-surgery.**



A

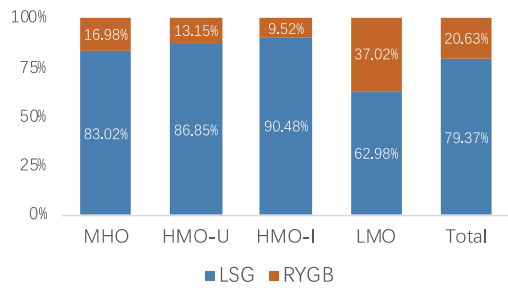

B

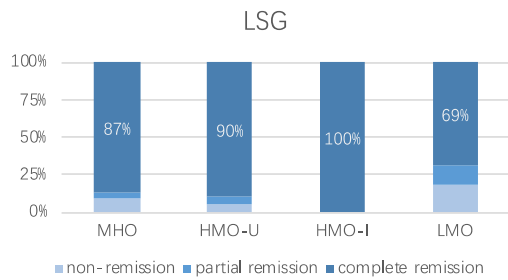

C

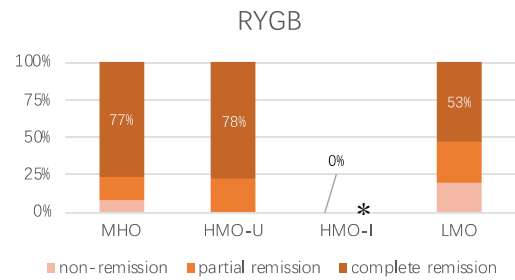

D

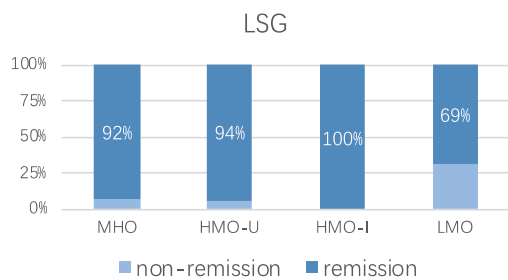

E

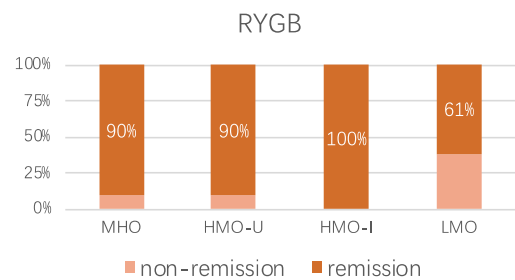

**Figure S2 Comparison of different AIM subgroups of obesity for the remission rate of diabetes and hyperglycemia at 12-month post-surgery with respective to LGS and RYGB.**

A, Proportion of LSG and RYGB with respective to each subgroup at baseline; B, C, Remission rate of diabetes at 12-month in LSG (B) and RYGB (C); D, E, Remission rate of hyperglycemia at 12-month in LSG (D) and RYGB (E). MHO, metabolic healthy obesity; HMO-I, hypermetabolic obesity hyperinsulinemia subtype; HMO-U, hypermetabolic obesity hyperuricemia subtype; LMO, hypometabolic obesity; LGS, Laparoscopic sleeve gastrectomy; RYGB, Roux-en-Y gastric bypass. \* No patients with diabetes from HMO-I subgroup and performed with RYGB has the 12-month visit.

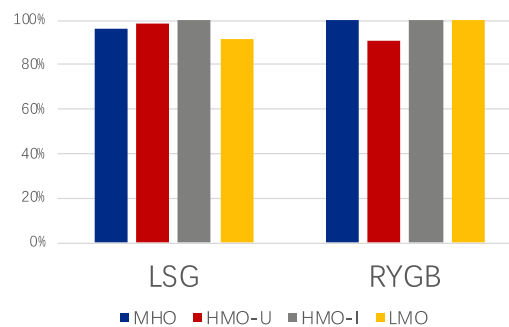

**Figure S3 A. Comparison of different AIM subgroups of obesity for the remission rate of hyperinsulinemia in LGS and RYGB.** MHO, metabolic healthy obesity; HMO-I, hypermetabolic obesity hyperinsulinemia subtype; HMO-U, hypermetabolic obesity hyperuricemia subtype; LMO, hypometabolic obesity; LGS, Laparoscopic sleeve gastrectomy; RYGB, Roux-en-Y gastric bypass.
